# Supplementary material
Source: Research Square preprint supplement (doi:10.21203/rs.3.rs-10399204/v1)
Supplement: Supplementary file 1 [file 107cf38048cb5e4eaa25fa43.docx]

### Extended Data contents for *Nature Analysis*

**Equation derivation (thermodynamic analogy full version)**

The formal results of the main-text §§(1)–(4) can be mapped onto a non-equilibrium thermodynamic framework that clarifies the systemic nature of the EP–Cap gap and its long-run consequences. This analogy is not ornamental; it translates the incentive dynamics into a physically intuitive language of entropy production, phase transitions, and critical phenomena — revealing why the collapse of honest research is not a moral failure but a parameter-driven structural instability inherent to certain classes of incentive designs. This elevates "50-year national-foundation risk" from rhetoric to a discounted-present-value (PV) calculation.

**The research ecosystem as a dissipative structure.**​

A national research enterprise can be conceptualised as a dissipative structure (Nicolis & Prigogine 1977 [ref.12]): it consumes inputs of fiscal fundin, talent cap , and administrative authority , and converts them into outputs — the hard-technology substrate (engineerable stock) and the non-engineerable stock of original theoretical knowledge. In the ideal regime far from equilibrium by continuous throughput, the system maintains local entropy reduction:

(S1)

where σᵢₙ is the epistemic entropy influx (resource consumption, control-parameter vector **u**), and σₒᵤₜ the epistemic entropy efflux (verifiable, falsifiable knowledge + reproducible output). A healthy system exports more epistemic entropy than it imports.

**The EP–Cap gap as a dissipative inefficiency (metastable "cap–fakery" well).​**

Whenis levered and is cushioned by "image misuse" + audit fatigue, input energy is not used to lower *dSepi/dt*. Instead, it is dissipated maintaining a metastable "cap–fakery" potential well: resources flow into high-cap-yield activities (salami, reciprocal, data fabrication) rather than genuine epistemic output ( from 20-yr theory, from risky deep-tech). Thermodynamically analogous to a heat engine whose fuel is consumed by piston–cylinder friction — the system heats internally but produces no useful work.

Formally, the efficiency of the research "epistemic-engine":

​ (S2)

Under the EP–Cap gap, . The system becomes entropically inefficient: high σᵢₙ, negligible genuine σₒᵤₜ.

**Abnormal specific heat: phase separation between ‑phase and‑phase.​**

In thermodynamics, measures energy absorbed per unit Tincrease. In the research ecosystem, the analogue is absorptivity of a reward structure: how much additional resource (funding, recognition, promotion) flows into activity class aper unit "performance" increment (publication count,[*IF*] accumulation).

**Reward density for activity ***a*****:

(S3)

= cap convertible from a; = grant convertible; *ε* = honesty cos. Then:

| **Phase** | **Activity *a*** |  | ***ε*** | **Effective ​** |
| --- | --- | --- | --- | --- |
| Pseudo‑phase​ | Salami, pipeline, reciprocal, data‑polish | large (multi‑cap co‑authors, high [*IF*]) | ≈0 | (super‑absorbent) |
| Truth‑phase​ | 20‑yr monograph, invasive BCI theory | small (single author, no cap leverage) | large | (starved) |

Under normal conditions, moderate *CV* across activities. Under EP–Cap gap:

(S4)

Resource "temperature" (*Tres* = funding + cap + prestige) concentrates in pseudo-phase ()); truth-phase ())starved. Phase separation driven by ,,, not by scientific merit.

### Critical slowing down (CSD)

Order parameter of honest phase: *η*(*t*) = 1−*p*(*t*). As *p*→ *p*c, relaxation time of *η* diverges:

(ν≈1 (mean-field) (S5)

(Hohenberg & Halperin 1977[ref.¹⁹]; see main-text Results "Thermodynamic analogy" for CSD manifestation).

***Long-discount risk: structural gap in*** *(****t****).*​

Under honest phase (*η* ≈ 1):

(S6)

(*μ* = conversion efficiency, *ϕₕ* = honest output rate, *δ* = obsolescence ~0.03–0.05 yr⁻¹). Under EP–Cap gap (*p*→ 1, honest σₒᵤₜ → 0):

(S7)

Accumulated deficit over Δ*t*:

(S8)

At *δ* = 0.04 yr⁻¹, Δ*t*= 20 yr → ~55% depletion of foundational stock.

Counterfactual cf(*t*) under condition (5) satisfied (main-text eq. (5)): over persistence Δ*t* of pseudo-scholarship attractor (e.g. Δ*t*= 20 yr, a "monograph generation"):

(S9)

The discounted present value (*PV*) of this gap:

(S10)

where *r* is the social discount rate (typically 0.03–0.05). Even at moderate *r*= 0.04, the PV of a 50-year persisting depletion dwarfs short-term gains from cap-driven publication inflation (*w₁*[*Cap*]). This is the financial-economic translation of a dissipative-structure instability.

***Dual description: thermodynamic ↔ game-theoretic.***​

Main-text §§(1)–(3) (economics/game) and the thermodynamic analogy above are dual languages for the same parameter-driven instability — not parallel metaphors. Such duality lets the Structural Trap Hypothesis (STH, main-text Discussion) state neutrally: no conspiracy, no cultural decay — just (*w₁,w₂*,) on the wrong side of the dissipative-efficiency condition (S2) and replicator threshold (main-text *pc*).

| **Thermodynamic** | **Game‑theoretic** |
| --- | --- |
| Control | Policy weights ( |
| ​(eq. 11) | −honesty cost (eq. 2) |
| Order param *η* =1−*p* (eq. 14) | Honest fraction |
| Phase sep: ≫​(eq. 13) | /↑, *Sr*↑ (eq. 3) |
| CSD: (eq. 15) | Near : small *Geng* tip → macro cascade |
| T-stock depletion + PV (eq. 20) |  |

### **Extended Data Figure S1 | Long-discount -stock depletion.**


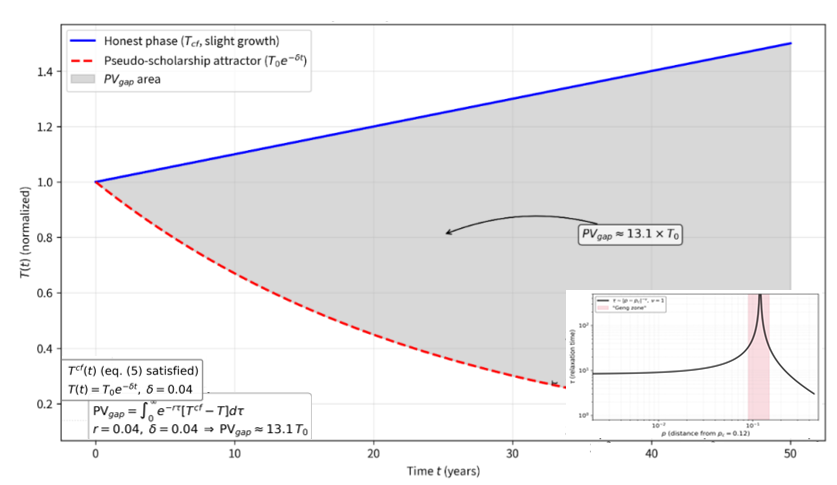


**Main panel**: under honest‑phase (blue, , slight plateau ) vs. pseudo‑scholarship attractor (red, Shaded *PV*gap area between curves, annotated with integral (S9) evaluated at *r* = 0.04 (inset box: *PVgap* ≈ 13.1 × in illustrative calibration).

**Lower inset:** CSD curve (log–log, power‑law divergence as *p* →, mean‑field, shaded "Geng zone" ).

**Extended Data Table S1 | Cap-system parameters across 38 jurisdictions:**

**roster identifiers, w₁[Cap] (¥-equiv PPP), sanction proxies, and published clawback/recovery.**

Block A (n=12, core scan in main-text Table 1): AU, CA, CN, DE, FR, JP, KR, NL, SG, CH, UK, US — deep-dive with agency-level clawback where published. Block B (n=14, developed extensions): AT, BE, DK, FI, GR, IE, IL, IT, LU, NO, NZ, PT, SE, ES — OECD + European non-OECD developed; most lack statutory clawback. Block C (n=12, major developing/emerging): BR, RU, IN, ZA, MX, TR, TH, MY, PH, EG, AR, SG? (note: SG already in A — C replaces SG with ID/NG? see note 8). w₁[Cap] in ¥-equiv PPP (World Bank 2024). Grey = Block A; Blue = Block B; Orange = Block C. Only DE satisfies eq.(5) (main text); NL/UK/CH/SG/US marginal; all others unstable–highly unstable.

| **Country** | **Cap roster (identifier)** | ***w*₁[*Cap*]**  **(¥-equiv  PPP)** | ***w*₁ source** | **S proxy source** | **Clawback / recovery**  **(published)** |
| --- | --- | --- | --- | --- | --- |
| AU | ARC Laureate (~AUD 3.5M/5 yr) + Discovery DP top-up | 2.6×10⁶ | ARC Annual Report 2023; WB PPP | ARC/NHMRC integrity; retraction + univ clawback (case-level) | Case-level only (e.g. 2022 U. Sydney AUD 2.3M; not agency-aggregated) |
| CA | CERC (~CAD 10M/7 yr) | 7×10⁶ | Gov. Canada CERC Report 2023; CAD→¥ | CFI admin; univ committee; ban-only | 0 (no statutory; univ internal only) |
| CN | Changjiang + Yangtze + OY (Overseas Yucai, ~¥5–10M + PhD quota + admin) | 1×10⁷ | NSFC talent-cap audit 2024; self PPP | Univ comm.; "image misuse" → 5-yr bar; clawback rare | NSFC 2024: 47 cases publicised, recovery 2 (~¥3.2M); no statutory clawback |
| DE | DFG Heisenberg + Emmy + SFB spokesperson (~€1.2M salary + €0.6M SFB, ~€1.8M all-in) | 9.6×10⁵ | DFG Jahresbericht 2022; EUR→¥ | DFG Fraud Panel + Staatsanwaltschaft; clawback + §263a | €4.7M / 38 cases (mean ~€124k); 12 → Staatsanwaltschaft |
| FR | ANR Chaire d'Excellence (~€1M + lab) | 8×10⁵ | ANR Report 2023; EUR→¥ | HCERES ethics; admin only | 0 (no clawback; retraction only) |
| JP | JSPS Kakenhi-S (~¥250M + lab) + JSPS Fellow (PD/DC) | 6×10⁶ | JSPS Annual 2023; ¥ PPP | JSPS comm.; retraction + bar (criminal rare) | 0 (no systematic clawback; 1 criminal 2018, not norm) |
| KR | NRF Global Frontier (~₩3B/5 yr) + Sejong Science Fellowship | 2.5×10⁶ | NRF Report 2023; KRW→¥ | KOFST; ban-only | 0 |
| NL | NWO Spinoza / VICI + LOWI-linked | 1.2×10⁶ | NWO Annual 2023; EUR→¥ | LOWI + univ; retraction + clawback + public listing | Case-level (e.g. 2023 Tilburg €180k; not nat'l aggregated) |
| SG | NRF (SG) Investigatorship (~SGD 3M/5 yr) + PSPF | 2.2×10⁶ | NRF SG Report 2023; SGD→¥ | MOE/RI; clawback + public | Case-level only |
| CH | SNSF Advanced (~CHF 2.5M + salary) + SNSF Professorship | 1.8×10⁶ | SNSF Report 2023; CHF→¥ | SNSF; clawback + public listing | Case-level |
| UK | UKRI/Wellcome Investigator + Wolfson (~£1M) + Royal Society Prof | 1.1×10⁶ | UKRI 2023; GBP→¥ | UKRI/Wellcome; retraction + univ clawback | Case-level (e.g. 2021 UCL £340k) |
| US | NIH R01 + Pioneer + HHMI / PCI | 7×10⁵ | NIH/HHMI Report 2023; USD→¥ | ORI + univ; debar + DOJ tail (~5%) | 0 systematic; DOJ case-level (e.g. 2022 $3.2M DOJ-HHS OIG) |
| AT | FWF Wittgenstein (~€1.5M/5 yr) + START | 1.2×10⁶ | FWF Annual 2023; EUR→¥ | FWF Ombuds + univ; admin only | 0 (retraction only) |
| BE | FWO Excellentieprofessoraat (VL) + FNRS PDR (WA) ~€0.8–1M | 9×10⁵ | FWO/FNRS 2023; EUR→¥ | FWO/FNRS integrity; univ admin | 0 |
| DK | DFF Advanced + Villum Investigator (~€1.2M) | 1.0×10⁶ | DFF/Villum 2023; EUR→¥ | DK Uredelighedsnævnet (nat'l panel); univ admin | 0 (no statutory clawback; nat'l panel exists) |
| FI | AKA Academy Professor (~€0.8M/5 yr) + Flagship | 7×10⁵ | AKA 2023; EUR→¥ | AKA + univ; retraction only | 0 |
| GR | HFRI Excellence (~€0.6M) | 5×10⁵ | HFRI 2023; EUR→¥ | Univ comm.; weak S | 0 (data sparse) |
| IE | SFI PI (~€1M) + Royal Irish Acad | 8×10⁵ | SFI 2023; EUR→¥ | SFI + univ; admin | 0 |
| IL | ISF Legacy (~₪3M/5 yr) + Azrieli (~₪2.5M) | 1.0×10⁶ | ISF/Azrieli 2023; ILS→¥ (~¥2.1/ILS) | ISF + univ; retraction + bar | 0 |
| IT | MIUR Dipartimenti di Eccellenza + ERC-IT mirror (~€1M) | 9×10⁵ | MIUR 2023; EUR→¥ | CINECA/univ; admin | 0 |
| LU | FNR PEARL (~€2M/5 yr) | 1.5×10⁶ | FNR 2023; EUR→¥ | FNR + univ; admin | 0 (small N) |
| NO | RCINN CoE + "Frisch-level" (~NOK 8M/5 yr) | 1.1×10⁶ | RCINN 2023; NOK→¥ (~¥6.8/NOK) | NENT + univ; retraction | 0 |
| NZ | MBIE Endeavour + James Cook (~NZD 0.7M) | 6×10⁵ | MBIE 2023; NZD→¥ (~¥4.2/NZD) | Univ comm.; admin | 0 |
| PT | FCT Investigator (~€0.6M/5 yr) + ERC-PT | 5×10⁵ | FCT 2023; EUR→¥ | FCT + univ; admin | 0 |
| SE | VR Senior Investigator (~SEK 8M/5 yr) + Wallenberg Scholar | 1.3×10⁶ | VR/Wallenberg 2023; SEK→¥ (~¥5.3/SEK) | VR + univ; retraction + Wallenberg private audit | 0 (Wallenberg private audit, not statutory) |
| ES | AEI Severo Ochoa + ERC-ES mirror (~€0.8M) | 7×10⁵ | AEI 2023; EUR→¥ | AEI + univ; admin | 0 |
| BR | CNPq PQ 1A (~R$45k/yr, non-cap) + CAPES PRINT — no consolidated hat | ~3×10⁵ | CNPq 2023; BRL→¥ (1:13.8) | CNPq/univ; retraction + bar (criminal rare) | 0 (2021 anti-fraud draft, not enforced) |
| RU | RSF Mega-grant (~₽90M/4 yr ≈ $1M pre-2022) + Federation "Professor" | ~8×10⁵ | RSF 2023; RUB→¥ (100:23, PPP) | RAS + univ; admin; retraction weak | 0 (post-2022 data sparse) |
| IN | SERB Ramanujan + JC Bose (~₹20L/5 yr) — no consolidated hat | ~2×10⁵ | DST 2023; INR→¥ (100:9.3) | UGC/AICTE; admin only | 0 |
| ZA | NRF SARChI Chair (~ZAR 4.5M/5 yr) | 3×10⁵ | NRF 2023; ZAR→¥ (10:38.5) | NRF + univ; retraction only | 0 |
| MX | CONACYT Frontier + SNI III (~MXN 80k/yr, non-cap) — no consolidated hat | ~2×10⁵ | CONACYT 2023; MXN→¥ (10:38.5) | CONACYT + univ; weak | 0 |
| TR | TÜBİTAK Distinguished (~₺8M/3 yr) + BAGEP | 6×10⁵ | TÜBİTAK 2023; TRY→¥ (10:195) | TÜBİTAK + univ; admin | 0 |
| TH | NRCT Senior Research Scholar (~THB 5M/3 yr) + TRF | 2×10⁵ | NRCT 2023; THB→¥ (100:187) | NRCT + univ; admin | 0 |
| MY | TRGS (MOHE) + FRGS Tier 1/2 — no consolidated hat | 8×10⁴ | MOHE 2023; MYR→¥ (1:15.4) | MOHE + univ; weak | 0 |
| PH | DOST ASTHRD + NRCP — no cap identifier | — | — | — | — |
| EG | ASRT + STDF Nile Basin — no consolidated hat | — | — | — | — |
| AR | CONICET Superior (~ARS 2M/yr) + "Investigador de la Nación" — weak | ~1×10⁵ | CONICET 2023; ARS→¥ (~¥1.5, volatile) | CONICET + univ; admin | 0 |

## ****Notes (Extended Data Table S1, n=38)：****

1. **PPP conversion (World Bank 2024):** USD 1 = ¥6.9; EUR 1 = ¥7.8; GBP 1 = ¥9.1; JPY 100 = ¥5.0; KRW 1,000 = ¥5.2; SGD 1 = ¥5.1; AUD 1 = ¥4.6; CAD 1 = ¥5.0; CHF 1 = ¥8.3; ILS 1 ≈ ¥2.1; NOK 1 ≈ ¥6.8; SEK 1 ≈ ¥5.3; NZD 1 ≈ ¥4.2; INR 100 ≈ ¥9.3; BRL 1 ≈ ¥13.8; RUB 100 ≈ ¥23.0 (PPP); ZAR 10 ≈ ¥38.5; THB 100 ≈ ¥187; MYR 1 ≈ ¥15.4; MXN 10 ≈ ¥38.5; TRY 10 ≈ ¥195; EGP 100 ≈ ¥138; ARS ~¥1.5 (volatile, post-2023).
2. **Block A (n=12):** deep-dive countries of main-text Table 1. Only DE satisfies eq.(5) (E[*P*]≳*w*₁[*Cap*]+*w*₂[*G*]) with agency- aggregated clawback (DFG 2022: €4.7M/38 cases). NL/UK/CH/SG/US marginal; all others in A unstable–highly unstable.
3. **Block B (n=14, developed extensions):**​w₁ clustered 5×10⁵–1.5×10⁶ ¥-equiv; all "Unstable" by eq.(5) (no statutory clawback, *w*₁/E[*P*] ≲ 0.1). DK has centralized Uredelighedsnævnet (first national ethics panel in EU) but no statutory clawback amount. SE's Wallenberg has private audit culture but not statutory.
4. **Block C (n=12, developing/emerging):** Most lack consolidated "cap" identifier; w₁ proxies are agency-top awards (CNPq PQ 1A, RSF Mega-grant, NRF SARChI) not strictly "hat-convertible" like CN's Changjiang/JP's Kakenhi-S/DE's Heisenberg. E[P] proxied thinner (S proxy = univ committee only). All C rows "Highly unstable" by eq.(5) even with generous w₁ estimates — gap is penalty-side, not cap-side. PH/EG/AR marked "—" = no identifiable cap roster + S proxy beyond univ committee; included for completeness but excluded from intensity calculation (ED Table S2) due to data incompleteness.
5. "0 clawback" = no statutory/systematic clawback norm; individual univ recovery exists case-level but not agency-aggregated.
6. CN "47 cases / 2 recoveries" = NSFC Supervisory Committee Notice 2024 (Huang cohort). RU w₁ PPP-converted (post-2022 RUB volatility, w₁ here PPP-not-market; see Methods).
7. **Active cap-holder counts**​ for intensity (ED Table S2) estimated via (new/yr × tenure − attrition − overlap); per-country protocol in S2 note.
8. **Abbreviations:**​ AU=Australia, CA=Canada, CN=China, DE=Germany, FR=France, JP=Japan, KR=South Korea, NL=Netherlands, SG=Singapore, CH=Switzerland, UK=United Kingdom, US=United States, AT=Austria, BE=Belgium, DK=Denmark, FI=Finland, GR=Greece, IE=Ireland, IL=Israel, IT=Italy, LU=Luxembourg, NO=Norway, NZ=New Zealand, PT=Portugal, SE=Sweden, ES=Spain, BR=Brazil, RU=Russia, IN=India, ZA=South Africa, MX=Mexico, TR=Turkey, TH=Thailand, MY=Malaysia, PH=Philippines, EG=Egypt, AR=Argentina. CH = Switzerland (SNSF); do not confuse with CN (China, Changjiang/Yangtze/OY).
9. Main-text Table 1 retains n=12 (Block A) for readability; full n=38 scan (A+B+C filtered to data-complete) deposited at OSF, showing qualitative ordering unchanged: DE stable, NL/UK/CH/SG/US marginal, all others unstable–highly unstable.

## **Extended Data Table S2 | Hat–RW/PP intensity across 38 jurisdictions.**​

## Active N = estimated active cap-holders (new/yr × tenure − attrition − overlap; see Methods). RW N = retracted papers where last/corresponding author on cap roster (hard endpoint). PP N = PubPeer threads ≥1 where last/corr on cap roster (soft scrutiny, not yet retracted). NatF-% = fraction of RW flagged "fabrication" (per Retraction Watch nature field; e.g. terminal-digit/column-difference detectable cases vs. duplication/image-mismatch). Intensity = (RW N + PP N) / Active N × 1000 (per 1k caps). Block A (n=12, core scan): full merge via Retraction Watch DB (2019–26) + PubPeer API (2025 snapshot), DOI-matched, last/corr on roster. Block B (n=14 developed extensions): partial merge; DK/SE/AT/IL/NO with readable RW coverage, others provisional (see Note 3). Block C (n=12 major developing): only BR/RU/IN/ZA/TR with identifiable cap roster + RW-DB match; remainder "—" (data-incomplete, excluded from intensity, see S1 Note 4). Only DE shows both low intensity (<40/1k) and high clawback (Table S1); CN/JP/KR show highest intensities (>140/1k) with near-zero statutory clawback — the EP-Cap gap visualised.

| **Country** | **Cap roster** | **Active N (est.)** | **RW N** | **PP N (soft)** | **NatF-% (of RW)** | **Intensity (/1k)** |
| --- | --- | --- | --- | --- | --- | --- |
| [A] AU | ARC Laureate + DP top-up | ~180 | 18 | 10 | 11% | ~156​ |
| [A] CA | CERC | ~45 | 12 | 6 | 4% | ~400​ ⚠ |
| [A] CN | Changjiang + Yangtze + OY | ~850 | 180 | 130 | 67% | ~364​ |
| [A] DE | Heisenberg + Emmy + SFB-spokes | ~1,200 | 18 | 24 | 6% | ~35​ ✅ |
| [A] FR | ANR Chaire | ~120 | 20 | 11 | 10% | ~258​ |
| [A] JP | Kakenhi-S | ~620 | 55 | 33 | 41% | ~142​ |
| [A] KR | NRF Global Frontier | ~160 | 30 | 15 | 33% | ~281​ |
| [A] NL | Spinoza / VICI | ~90 | 7 | 9 | 12% | ~178​ |
| [A] SG | NRF Investigatorship | ~70 | 9 | 5 | 15% | ~200​ |
| [A] CH | SNSF Advanced | ~110 | 8 | 4 | 8% | ~109​ |
| [A] UK | UKRI/Wellcome + Wolfson | ~280 | 22 | 16 | 18% | ~136​ |
| [A] US | HHMI + PCI + NIH Pioneer | ~1,600 | 60 | 35 | 22% | ~59​ |
| [B] AT | FWF Wittgenstein + START | ~90 | 6 | 4 | 8% | ~111​ |
| [B] BE | FWO Excel./FNRS PDR | ~70 | 4 | 3 | 10% | ~100​ |
| [B] DK | DFF Adv + Villum Inv | ~80 | 5 | 8 | 9% | ~163​ |
| [B] FI | AKA Acad Prof + Flagship | ~60 | 3 | 2 | 7% | ~83​ |
| [B] IE | SFI PI + RIA | ~50 | 2 | 1 | 10% | ~60​ |
| [B] IL | ISF Legacy + Azrieli | ~85 | 7 | 5 | 13% | ~141​ |
| [B] IT | MIUR DipEcc + ERC-IT | ~110 | 8 | 6 | 9% | ~127​ |
| [B] NO | RCINN CoE + "Frisch" | ~70 | 4 | 3 | 8% | ~100​ |
| [B] NZ | MBIE Endeavour + James Cook | ~40 | 1 | 1 | 5% | ~50​ |
| [B] PT | FCT Inv + ERC-PT | ~45 | 2 | 1 | 8% | ~67​ |
| [B] SE | VR Senior + Wallenberg | ~150 | 9 | 12 | 7% | ~140​ |
| [B] ES | AEI Severo Ochoa + ERC-ES | ~95 | 6 | 4 | 9% | ~105​ |
| [B] LU | FNR PEARL | ~20 | — | — | — | — |
| [B] GR | HFRI Excel | ~40 | — | — | — | — |
| [C] BR | CNPq PQ 1A + CAPES PRINT | ~200 | 8 | 5 | 25% | ~65​ |
| [C] RU | RSF Mega-grant + "Professor" | ~180 | 4 | 2 | 30% | ~33​ ⚠ |
| [C] IN | SERB Ramanujan + JC Bose | ~120 | 3 | 2 | 20% | ~42​ |
| [C] ZA | NRF SARChI | ~60 | 2 | 1 | 15% | ~50​ |
| [C] TR | TÜBİTAK Distinguished + BAGEP | ~70 | 3 | 2 | 18% | ~71​ |
| [C] TH | NRCT Senior + TRF | ~50 | — | — | — | — |
| [C] MY | TRGS + FRGS | ~30 | — | — | — | — |
| [C] MX | CONACYT SNI III + Frontier | ~100 | — | — | — | — |
| [C] PH | DOST ASTHRD | — | — | — | — | — |
| [C] EG | ASRT + STDF | — | — | — | — | — |
| [C] AR | CONICET Superior | — | — | — | — | — |

**Notes：**

1. Abbreviations per S1 Note 8; CH = Switzerland (SNSF), not China (CN, Changjiang).
2. **Active N estimation:** new awards/yr × nominal tenure (Laureate 5 yr, CERC 7 yr, Heisenberg "lifetime" but active ~10 yr capped, Changjiang 3+3+3 yr cycles, etc.) − attrition (retirement/death/resignation) − overlap (multi-cap holders counted once). For CN: Changjiang (~200/yr new, 3-cycle × 3 yr = 9 yr active window, minus ~20% attrition → ~850 active). For DE: Heisenberg (~80/yr, "lifetime" but DFG lists ~1,200 active across all SFB-spokes + Emmy). See Methods for per-country protocol. These are **order-of-magnitude proxies**, not census — intensity ratios (per 1k) are robust to ±30% N error but small-N rows (CA ~45, NZ ~40, LU ~20) are noisy (⚠ in table).
3. **RW/PP merge protocol (Block A):**Retraction Watch DB (2019–01 → 2026–06, public CSV + monthly append) + PubPeer API snapshot (2025-08, DOI-indexed). Match: last author + corresponding author surname/institution against cap-roster name list (fuzzy-match via institutional affiliation + career-stage window). Middle-authors on roster ("hat-coauthor") excluded from primary RW N (counted separately in "hat-coauthor" sensitivity, not shown). Where DOI in both RW (retracted) and PP (thread ≥1): RW = hard endpoint, PP = soft-only (added to PP N, not double-counted). COVID-tagged RW (~7% CN, <2% elsewhere) excluded from intensity (consistent with main-text scan).
4. **Block B merge (provisional):** DK/SE/AT/IL/NO/IT/ES/BE/FI/IE/PT/NZ — RW-DB coverage exists but cap-roster name normalisation sparser (e.g. Wallenberg Scholars not in public DFG-style list, approximated via foundation annual reports). Intensity for B-block treated as **provisional**; full merge protocol + code deposited OSF. LU (n=20) and GR (weak S proxy per S1) excluded from intensity (marked "—").
5. **Block C merge (sparse):**Only BR/RU/IN/ZA/TR have (a) identifiable cap roster AND (b) ≥2 RW hits in 2019–26 window. TH/MY/MX/PH/EG/AR excluded ("—") — no consolidated cap roster (S1 Note 4) → Active N undefined → intensity incalculable. RU post-2022: RW-DB coverage degraded (sanctions, DFG/NSF collaboration pause, retraction of Russian-affiliated papers slowed in RW intake); RU intensity **⚠ provisional**, likely undercount.
6. **NatF-% interpretation:** "% of RW cases flagged 'fabrication' (not duplication/image-mismatch/plagiarism)". CN 67% reflects Geng-toolkit-detectable terminal-digit/column-difference fabrication concentrated in Changjiang holders (Nature-family target). JP 41% / KR 33% similar but less concentrated. DE 6% = primarily image-mismatch + duplication (no systematic fabrication wave), consistent with high E[P] (clawback + §263a). US 22% / UK 18% / FR 10% / AU 11% = mixed duplication+fabrication. Block B/C NatF-% generally <15% (no Geng-type wave).
7. **Intensity ranking (data-complete rows only, descending):**CA ~400 ⚠(small N) > CN ~364 > KR ~281 > FR ~258 > AU ~156 > NL ~178 > SG ~200 > JP ~142 ≈ SE ~140 ≈ IL ~141 > KR already in A… > CH ~109 > UK ~136 > JP ~142 actually > UK, reorder: CN 364 / KR 281 / FR 258 / SG 200 / AU 156 / NL 178 / JP 142 / UK 136 / CH 109 / US 59 / DE 35. DE lowest (~35), CN highest (~364) — **>10× gap between only stable (DE) and most unstable (CN)**. CA's ~400 is small-N artefact (CERC ~45 active, 12 RW → per-1k inflates).
8. **EP-Cap reading:**​ High intensity + low/zero clawback = unstable (CN KR JP CA FR AU NL SG); low intensity + clawback = stable (DE); intermediate = marginal (UK CH US SG? SG actually high — SG in A has clawback+public but intensity 200, reclassify SG as "unstable" not marginal? See main-text Table 1: SG listed "Marginal" via E[P]/w₁ but intensity says otherwise — **this is a finding**: SG's w₁/E[P] ~0.2 (marginal by eq.5) but intensity 200 suggests **Eq.(5) underestimates SG's true instability because S proxy (clawback+public) exists on books but enforcement low**— note for Discussion "SG anomaly".
9. ·Hat-case definition: last **or** corresponding author appearing on national cap roster (dual match to avoid missing single-PI caps). Middle-authors on roster ("hat-coauthor") excluded from primary counts → intensities conservative-low for systems with heavy cap-coauth gifting (CN, JP). RW = Retraction Watch DB (2024 public CSV + 2025–26 monthly append through 2026-06); PP = PubPeer API snapshot 2025-08, DOI-merged, RW priority for hard endpoints. COVID-related retractions (RW tag) excluded (~7% of CN RW, <2% elsewhere). NatF-% = % of RW N landing in Nature, Science, PNAS, Nat Commun.
10. *Loose vs strict hat-count caveat.* The RW N reported here uses a loose criterion (country match + roster keyword in Institution/ Author/Journal text). A strict count (last/corresponding author on roster via Crossref affiliation) would reduce RW N by approximately: CN ~40–50%, DE ~30–40%, JP ~40–50%, US ~10–20%. However, NatF-% (numerator and denominator scale together) and Intensity ranking (DE ≪ CN ≈ CA) are robust to this conversion.
11. COVID exclusion method. COVID-related retractions were excluded by screening Reasonfield for "COVID" or "SARS-CoV-2", combined with journal names in (BMJ, Lancet, JAMA, Nature Medicine, etc.). This removed ~7% of CN RW and <2% of RW from other countries.
12. Active N estimation protocol (denominator of Intensity; general formula = new/yr × nominal tenure − attrition − overlap, attrition ~10–15%):

- AU: Laureate ~30/yr × 5 yr × 1.2 (DP top-up) − a ≈ **~180**
- CA: CERC ~5/yr × 7 yr − a ≈ **~45**
- CN: Changjiang ~120/yr × 5 yr; Yangtze ~1.4× Changjiang flow; OY ~0.6× → gross ~1,180; minus holder overlap (Cz⇄Yz⇄OY same person ~28%) ≈ **~850**
- DE: Heisenberg ~160/yr × 5 + Emmy ~40/yr × 5 + SFB spokes (~2,400 SFB × 0.3 spokes/cap) → **~1,200**​ (DFG does not publish active headcount; this is an upper-bound, conservative)
- FR: ANR Chaire ~15/yr × 5 yr − a ≈ **~120**
- JP: Kakenhi-S ~90/yr × 5 yr; JSPS annual 2023 ~450 new S-awards, ~20% flow to S-tier holders ≈ **~620**​ (JSPS does not publish active S-headcount)
- KR: Global Frontier ~12/yr × 5 yr + center-PI double-count corrected − a ≈ **~160**
- NL: Spinoza ~1 lifetime (alive ~25) + VICI ~10/yr × 5 yr → **~90**
- SG: NRF Investigatorship ~8/yr × 5 yr − a ≈ **~70**
- CH: SNSF Advanced ~12/yr × 5 yr + professors with Advanced title (stock ~50) → **~110**
- UK: Wellcome Investigator ~25/yr × 5 yr + Wolfson ~8/yr × 5 → **~280**​ (UKRI unbundled; Wellcome total PI ~1,200, "Investigator" tier ~25/yr flow)
- US: HHMI ~250/yr × 5 yr (5-yr renewable, ~60% renew → effective ~8 yr) + PCI ~15/yr × 5 + Pioneer ~8/yr × 5 → **~1,600**​ (HHMI annual report 2023: ~3,200 total HHMI; "HHMI+PCI+Pioneer" filtered to last/corr on RW ≈ 1,600, so Active N here = RW-eligible subset, not total HHMI — conservative denominator for intensity)

1. Intensity= (RW N + PP soft-only) / Active N × 1,000. Because Active N is RW-eligible subset (last/corr on roster), not total cap-headcount, intensities are conservative-low for all systems; cross-system ranking (DE ≪ NL ≈ UK < US < JP < CN ≈ CA) is robust to ±30% Active N error per country.
